# Supplementary material for: Comparison of emergency department and hospital admissions data for air pollution time-series studies
Source: PubMed Central journal article supplement (PMC3511882; doi:10.1186/1476-069x-11-70), 2012-09-21
Supplement: 1476-069X-11-70-S1.pdf [file 1476-069X-11-70-S1.pdf]

**Table A.1. Cardiorespiratory outcomes of interest, defined based on the primary ICD-9 diagnosis code for the visit**

| <b>Case Group</b>       | <b>ICD-9-CM codes included</b>                                                  | <b>Description of Disease Entity</b>                                                                                                                                                                                                                                                                                                                                                                                                                                                                                                                                                                                                                                                                                                                                       |
|-------------------------|---------------------------------------------------------------------------------|----------------------------------------------------------------------------------------------------------------------------------------------------------------------------------------------------------------------------------------------------------------------------------------------------------------------------------------------------------------------------------------------------------------------------------------------------------------------------------------------------------------------------------------------------------------------------------------------------------------------------------------------------------------------------------------------------------------------------------------------------------------------------|
| <b>RD</b>               | 460-465, 466.0, 466.1, 466.11, 466.19, 477, 480-486, 491, 492, 493, 496, 786.07 | Acute nasopharyngitis [common cold]; Acute sinusitis; Acute pharyngitis; Acute tonsillitis; Acute laryngitis and tracheitis; Acute upper respiratory infections of multiple or unspecified sites; Acute bronchitis; Acute bronchiolitis; Acute bronchiolitis due to respiratory syncytial virus (RSV); Acute bronchiolitis due to other infectious organisms; Allergic rhinitis; Viral pneumonia; Pneumococcal pneumonia [Streptococcus pneumoniae pneumonia]; Other bacterial pneumonia; Pneumonia due to other specified organism; Pneumonia in infectious diseases classified elsewhere; Bronchopneumonia, organism unspecified; Pneumonia, organism unspecified; Chronic bronchitis; Emphysema; Asthma; Chronic airway obstruction, not elsewhere classified; Wheezing |
| <b>Pneumonia</b>        | 480-486                                                                         | Viral pneumonia; Pneumococcal pneumonia [Streptococcus pneumoniae pneumonia]; Other bacterial pneumonia; Pneumonia due to other specified organism; Pneumonia in infectious diseases classified elsewhere; Bronchopneumonia, organism unspecified; Pneumonia, organism unspecified;                                                                                                                                                                                                                                                                                                                                                                                                                                                                                        |
| <b>Asthma or Wheeze</b> | 493, 786.07                                                                     | Asthma; Wheezing                                                                                                                                                                                                                                                                                                                                                                                                                                                                                                                                                                                                                                                                                                                                                           |
| <b>CVD</b>              | 410-414, 427, 428, 433-437, 440, 443-445, 451-453                               | Acute myocardial infarction; Other acute and subacute forms of ischemic heart disease; Old myocardial infarction; Angina pectoris; Other forms of chronic ischemic heart disease; Cardiac dysrhythmias; Heart failure; Occlusion and stenosis of precerebral arteries; Occlusion of cerebral arteries; Transient cerebral ischemia; Acute, but ill-defined, cerebrovascular disease; Other and ill-defined cerebrovascular disease; Atherosclerosis; Other peripheral vascular disease; Arterial embolism and thrombosis; Atheroembolism; Phlebitis and thrombophlebitis; Portal vein thrombosis; Other venous embolism and thrombosis                                                                                                                                     |
| <b>Dysrhythmia</b>      | 427                                                                             | Cardiac dysrhythmias                                                                                                                                                                                                                                                                                                                                                                                                                                                                                                                                                                                                                                                                                                                                                       |
| <b>CHF</b>              | 428                                                                             | Heart failure                                                                                                                                                                                                                                                                                                                                                                                                                                                                                                                                                                                                                                                                                                                                                              |

ICD-9: International Classification of Diseases, 9<sup>th</sup> Revision, Clinical Modification, RD: respiratory disease group, CVD: cardiovascular disease group, CHF: congestive heart failure
