# Supplementary material for: Comparison of emergency department and hospital admissions data for air pollution time-series studies
Source: PubMed Central journal article supplement (PMC3511882; doi:10.1186/1476-069x-11-70), 2012-09-21
Supplement: 1476-069X-11-70-S2.pdf [file 1476-069X-11-70-S2.pdf]

**Table A.2. Percentage of records in each case group that had specific Primary ICD-9 codes, by visit type overall and by age group.\***

| ICD-9 Code                       | Interpretation                                                       | Overall       |               |                 |               | Age 0-1 years |              |                 |               | Age 2-18 years |              |                 |               | Age 19-64 years |              |                 |               | Age ≥65 years |              |                 |               |
|----------------------------------|----------------------------------------------------------------------|---------------|---------------|-----------------|---------------|---------------|--------------|-----------------|---------------|----------------|--------------|-----------------|---------------|-----------------|--------------|-----------------|---------------|---------------|--------------|-----------------|---------------|
|                                  |                                                                      | ED            | All HA        | Non-elective HA | HA through ED | ED            | All HA       | Non-elective HA | HA through ED | ED             | All HA       | Non-elective HA | HA through ED | ED              | All HA       | Non-elective HA | HA through ED | ED            | All HA       | Non-elective HA | HA through ED |
| <b>RD (Overall N)</b>            |                                                                      | <b>614944</b> | <b>112676</b> | <b>98405</b>    | <b>92999</b>  | <b>94203</b>  | <b>10202</b> | <b>9034</b>     | <b>8311</b>   | <b>184092</b>  | <b>12846</b> | <b>11671</b>    | <b>10633</b>  | <b>268446</b>   | <b>38067</b> | <b>32394</b>    | <b>30467</b>  | <b>68201</b>  | <b>51560</b> | <b>45305</b>    | <b>43587</b>  |
| 461.9                            | Acute sinusitis, unspecified site (%)                                | 6.85          | 0.17          | 0.15            | 0.14          | 0.99          | 0.04         | 0.04            | 0.05          | 3.89           | 0.18         | 0.15            | 0.13          | 12.23           | 0.30         | 0.29            | 0.25          | 1.71          | 0.09         | 0.08            | 0.08          |
| 462                              | Acute pharyngitis (%)                                                | 14.87         | 0.36          | 0.36            | 0.34          | 3.82          | 0.14         | 0.14            | 0.16          | 22.09          | 0.72         | 0.74            | 0.67          | 17.10           | 0.71         | 0.71            | 0.70          | 1.83          | 0.04         | 0.05            | 0.05          |
| 464.4                            | Croup (%)                                                            | 2.45          | 0.40          | 0.42            | 0.43          | 7.16          | 2.97         | 3.07            | 3.32          | 4.51           | 1.12         | 1.17            | 1.19          | 0.01            | 0.00         | 0.00            | 0.00          | 0.00          | 0.00         | 0.00            | 0.00          |
| 465.9                            | Acute upper respiratory infection, unspecified site (%)              | 19.81         | 1.40          | 1.42            | 1.41          | 42.30         | 5.73         | 6.27            | 6.24          | 20.89          | 2.06         | 2.16            | 2.10          | 15.04           | 1.19         | 1.06            | 1.10          | 4.59          | 0.54         | 0.52            | 0.53          |
| 466.0                            | Acute bronchitis (%)                                                 | 8.56          | 2.33          | 2.31            | 2.27          | 1.58          | 0.51         | 0.45            | 0.40          | 3.93           | 0.36         | 0.34            | 0.33          | 14.35           | 3.34         | 3.36            | 3.26          | 7.95          | 2.44         | 2.43            | 2.40          |
| 466.11                           | Acute bronchiolitis due to respiratory syncytial virus (RSV) (%)     | 1.05          | 2.97          | 3.04            | 2.90          | 6.39          | 30.27        | 30.42           | 29.94         | 0.23           | 1.99         | 2.04            | 1.99          | 0.00            | 0.00         | 0.00            | 0.00          | 0.00          | 0.00         | 0.00            | 0.00          |
| 466.19                           | Acute bronchiolitis due to other infectious organisms (%)            | 1.88          | 1.32          | 1.28            | 1.21          | 11.27         | 13.52        | 12.92           | 12.48         | 0.42           | 0.68         | 0.62            | 0.63          | 0.06            | 0.05         | 0.04            | 0.04          | 0.03          | 0.02         | 0.01            | 0.01          |
| 486                              | Pneumonia, organism unspecified (%)                                  | 14.37         | 45.10         | 45.05           | 45.66         | 10.34         | 20.11        | 19.84           | 20.14         | 9.62           | 28.16        | 26.03           | 25.51         | 11.35           | 42.66        | 42.81           | 43.01         | 44.60         | 56.07        | 56.57           | 57.28         |
| 491.21                           | Obstructive chronic bronchitis, with (acute) exacerbation (%)        | 3.73          | 15.40         | 15.19           | 15.23         | 0.01          | 0.01         | 0.01            | 0.01          | 0.02           | 0.03         | 0.03            | 0.01          | 3.43            | 15.85        | 15.73           | 15.73         | 20.09         | 21.94        | 21.73           | 21.51         |
| 493.01                           | Extrinsic asthma, with status asthmaticus (%)                        | 0.15          | 0.71          | 0.78            | 0.85          | 0.07          | 0.51         | 0.55            | 0.67          | 0.43           | 5.36         | 5.77            | 6.48          | 0.02            | 0.14         | 0.15            | 0.13          | 0.00          | 0.00         | 0.00            | 0.00          |
| 493.02                           | Extrinsic asthma, with (acute) exacerbation (%)                      | 1.57          | 1.52          | 1.60            | 1.67          | 1.54          | 2.45         | 2.59            | 2.82          | 4.13           | 8.26         | 8.57            | 9.40          | 0.21            | 0.99         | 1.01            | 1.01          | 0.02          | 0.04         | 0.03            | 0.03          |
| 493.22                           | Chronic obstructive asthma, with (acute) exacerbation (%)            | 0.67          | 3.49          | 3.52            | 1.79          | 0.00          | 0.01         | 0.00            | 0.00          | 0.01           | 0.05         | 0.05            | 0.05          | 0.93            | 6.11         | 6.24            | 6.32          | 2.33          | 3.10         | 3.17            | 3.12          |
| 493.90                           | Asthma, unspecified type, unspecified exacerbation status (%)        | 4.95          | 0.93          | 0.86            | 0.81          | 3.20          | 1.62         | 1.51            | 1.38          | 6.79           | 1.50         | 1.39            | 1.34          | 5.21            | 1.36         | 1.25            | 1.21          | 1.34          | 0.33         | 0.31            | 0.29          |
| 493.91                           | Asthma, unspecified type, with status asthmaticus (%)                | 0.83          | 3.96          | 4.40            | 4.43          | 0.73          | 6.24         | 6.85            | 7.22          | 1.97           | 25.76        | 27.97           | 29.17         | 0.27            | 1.28         | 1.29            | 1.29          | 0.05          | 0.06         | 0.06            | 0.05          |
| 493.92                           | Asthma, unspecified, with (acute) exacerbation (%)                   | 8.06          | 6.58          | 6.53            | 6.56          | 3.34          | 4.17         | 4.13            | 3.95          | 10.73          | 11.40        | 10.93           | 10.78         | 9.37            | 12.76        | 12.97           | 13.41         | 2.23          | 1.29         | 1.26            | 1.24          |
| <b>Asthma/Wheeze (Overall N)</b> |                                                                      | <b>111000</b> | <b>20537</b>  | <b>18436</b>    | <b>17584</b>  | <b>12236</b>  | <b>1812</b>  | <b>1651</b>     | <b>1565</b>   | <b>49978</b>   | <b>7095</b>  | <b>6724</b>     | <b>6426</b>   | <b>44400</b>    | <b>8955</b>  | <b>7711</b>     | <b>7394</b>   | <b>4386</b>   | <b>2675</b>  | <b>2350</b>     | <b>2199</b>   |
| 493.00                           | Extrinsic asthma, unspecified exacerbation status (%)                | 4.53          | 0.67          | 0.67            | 0.64          | 13.44         | 3.26         | 3.33            | 3.32          | 6.16           | 0.75         | 0.73            | 0.67          | 0.66            | 0.20         | 0.19            | 0.18          | 0.32          | 0.30         | 0.21            | 0.18          |
| 493.01                           | Extrinsic asthma, with status asthmaticus (%)                        | 0.82          | 3.88          | 4.18            | 4.47          | 0.51          | 2.87         | 3.03            | 3.58          | 1.60           | 9.70         | 10.01           | 10.72         | 0.11            | 0.61         | 0.61            | 0.55          | 0.00          | 0.04         | 0.00            | 0.00          |
| 493.02                           | Extrinsic asthma, with (acute) exacerbation (%)                      | 8.72          | 8.32          | 8.55            | 8.86          | 11.96         | 13.80        | 14.17           | 14.95         | 15.29          | 14.95        | 14.87           | 15.59         | 1.26            | 4.20         | 4.25            | 4.17          | 0.39          | 0.79         | 0.60            | 0.64          |
| 493.22                           | Chronic obstructive asthma, with (acute) exacerbation (%)            | 3.72          | 19.15         | 18.79           | 18.77         | 0.01          | 0.06         | 0.00            | 0.00          | 0.03           | 0.10         | 0.09            | 0.08          | 5.66            | 25.96        | 26.21           | 26.16         | 36.30         | 59.81        | 61.15           | 61.89         |
| 493.90                           | Asthma, unspecified type, unspecified exacerbation status (%)        | 27.50         | 5.09          | 4.58            | 4.32          | 24.78         | 9.11         | 8.24            | 7.41          | 25.09          | 2.72         | 2.41            | 2.23          | 31.61           | 5.77         | 5.24            | 5.02          | 20.88         | 6.36         | 6.09            | 5.87          |
| 493.91                           | Asthma, unspecified type, with status asthmaticus (%)                | 4.59          | 21.76         | 23.48           | 23.50         | 5.62          | 35.21        | 37.55           | 38.40         | 7.30           | 46.64        | 48.54           | 48.46         | 1.64            | 5.45         | 5.42            | 5.33          | 0.73          | 1.23         | 1.11            | 1.05          |
| 493.92                           | Asthma, unspecified type, with (acute) exacerbation (%)              | 44.79         | 36.09         | 34.86           | 34.74         | 25.78         | 23.45        | 22.59           | 21.02         | 39.64          | 20.65        | 18.98           | 17.86         | 56.83           | 54.26        | 54.52           | 55.33         | 34.66         | 24.79        | 24.38           | 24.60         |
| 786.07                           | Wheezing (%)                                                         | 3.85          | 1.42          | 1.26            | 1.27          | 16.68         | 8.77         | 7.45            | 7.54          | 3.72           | 1.76         | 1.55            | 1.57          | 0.73            | 0.04         | 0.03            | 0.03          | 1.12          | 0.15         | 0.13            | 0.14          |
| <b>Pneumonia (Overall N)</b>     |                                                                      | <b>98140</b>  | <b>59681</b>  | <b>51981</b>    | <b>49489</b>  | <b>11178</b>  | <b>2891</b>  | <b>2501</b>     | <b>2327</b>   | <b>19455</b>   | <b>4513</b>  | <b>3818</b>     | <b>3304</b>   | <b>33193</b>    | <b>18827</b> | <b>16072</b>    | <b>15143</b>  | <b>34313</b>  | <b>33449</b> | <b>29589</b>    | <b>28714</b>  |
| 486                              | Pneumonia, organism unspecified (%)                                  | 90.31         | 85.17         | 85.30           | 85.87         | 87.52         | 71.01        | 71.69           | 72.15         | 91.47          | 80.19        | 79.60           | 82.42         | 92.16           | 86.26        | 86.29           | 86.59         | 88.77         | 86.45        | 86.64           | 86.99         |
| 480.1                            | Pneumonia due to respiratory syncytial virus (%)                     | 0.64          | 1.00          | 0.95            | 0.88          | 4.31          | 14.84        | 14.15           | 13.67         | 0.68           | 3.15         | 3.20            | 3.18          | 0.02            | 0.08         | 0.05            | 0.04          | 0.02          | 0.03         | 0.03            | 0.03          |
| 480.9                            | Viral pneumonia, unspecified (%)                                     | 0.96          | 1.15          | 1.12            | 1.07          | 3.23          | 7.71         | 7.44            | 7.56          | 1.50           | 3.28         | 3.35            | 3.57          | 0.51            | 0.90         | 0.94            | 0.85          | 0.34          | 0.43         | 0.39            | 0.38          |
| <b>CVD (Overall N)</b>           |                                                                      | <b>210250</b> | <b>248810</b> | <b>176059</b>   | <b>155089</b> | <b>406</b>    | <b>196</b>   | <b>153</b>      | <b>125</b>    | <b>1054</b>    | <b>393</b>   | <b>294</b>      | <b>229</b>    | <b>80895</b>    | <b>90262</b> | <b>61416</b>    | <b>53021</b>  | <b>12789</b>  | <b>15795</b> | <b>11419</b>    | <b>101713</b> |
| 410.71                           | Subendocardial infarction, initial episode of care (%)               | 8.13          | 7.86          | 10.13           | 10.90         | 0.00          | 0.00         | 0.00            | 0.00          | 0.19           | 0.76         | 1.02            | 0.87          | 6.77            | 7.13         | 9.38            | 10.14         | 9.08          | 8.30         | 10.57           | 11.34         |
| 414.01                           | Coronary atherosclerosis, of native coronary artery (%)              | 10.36         | 21.18         | 14.48           | 11.65         | 0.00          | 0.00         | 0.00            | 0.00          | 0.00           | 0.00         | 0.00            | 0.00          | 13.20           | 27.40        | 19.95           | 16.36         | 8.68          | 17.71        | 11.60           | 9.24          |
| 427.0                            | Paroxysmal supraventricular tachycardia (%)                          | 1.49          | 0.62          | 0.75            | 0.80          | 2.96          | 9.69         | 9.15            | 8.00          | 6.07           | 2.80         | 3.40            | 4.37          | 2.55            | 0.84         | 1.02            | 1.11          | 0.78          | 0.48         | 0.59            | 0.61          |
| 427.31                           | Atrial fibrillation (%)                                              | 6.99          | 6.11          | 6.67            | 6.64          | 0.00          | 0.00         | 0.00            | 0.00          | 3.13           | 6.87         | 8.16            | 9.17          | 6.68            | 5.64         | 6.39            | 6.54          | 7.24          | 6.38         | 6.83            | 6.69          |
| 427.5                            | Cardiac arrest (%)                                                   | 3.66          | 0.16          | 0.21            | 0.22          | 43.35         | 7.14         | 8.50            | 10.40         | 14.23          | 2.54         | 2.72            | 3.49          | 4.14            | 0.16         | 0.22            | 0.24          | 3.14          | 0.14         | 0.19            | 0.20          |
| 427.89                           | Other specified cardiac dysrhythmias, other (%)                      | 4.14          | 2.20          | 2.49            | 2.66          | 22.17         | 21.43        | 25.49           | 28.80         | 40.32          | 24.94        | 17.69           | 18.34         | 5.05            | 1.97         | 2.23            | 2.40          | 3.21          | 2.25         | 2.57            | 2.72          |
| 427.9                            | Cardiac dysrhythmia, unspecified (%)                                 | 0.36          | 0.07          | 0.09            | 0.09          | 2.22          | 0.00         | 0.00            | 0.00          | 5.50           | 1.53         | 1.70            | 1.31          | 0.46            | 0.07         | 0.09            | 0.09          | 0.24          | 0.07         | 0.09            | 0.09          |
| 428.0                            | Congestive heart failure, unspecified type (%)                       | 23.30         | 21.11         | 24.72           | 26.07         | 17.00         | 47.96        | 43.79           | 42.40         | 3.98           | 13.74        | 14.63           | 9.61          | 17.72           | 16.26        | 19.13           | 20.53         | 27.01         | 23.87        | 27.72           | 28.97         |
| 434.91                           | Cerebral artery occlusion, unspecified, with cerebral infarction (%) | 6.92          | 6.17          | 8.02            | 8.93          | 1.23          | 3.06         | 3.92            | 4.00          | 1.33           | 3.05         | 4.08            | 5.24          | 5.49            | 5.10         | 6.86            | 7.82          | 7.89          | 6.79         | 8.66            | 9.52          |
| 435.9                            | Unspecified transient cerebral ischemia (%)                          | 5.83          | 3.08          | 4.02            | 4.51          | 0.00          | 0.00         | 0.00            | 0.00          | 0.66           | 1.02         | 1.36            | 1.75          | 4.78            | 2.62         | 3.54            | 4.03          | 6.56          | 3.35         | 4.29            | 4.77          |
| 443.89                           | Other specified peripheral vascular diseases (%)                     | 0.05          | 0.05          | 0.02            | 0.02          | 5.91          | 0.51         | 0.65            | 0.80          | 0.28           | 0.00         | 0.00            | 0.00          | 0.04            | 0.06         | 0.02            | 0.02          | 0.03          | 0.05         | 0.02            | 0.02          |
| 453.8                            | Venous embolism and thrombosis of other specified veins (%)          | 1.91          | 2.13          | 1.88            | 1.62          | 0.99          | 2.04         | 1.31            | 0.80          | 3.61           | 7.89         | 7.82            | 8.30          | 2.69            | 2.95         | 2.67            | 2.40          | 1.40          | 1.64         | 1.43            | 1.21          |
| <b>Dysrhythmia (Overall N)</b>   |                                                                      | <b>43449</b>  | <b>33449</b>  | <b>25183</b>    | <b>22261</b>  | <b>290</b>    | <b>80</b>    | <b>70</b>       | <b>59</b>     | <b>792</b>     | <b>195</b>   | <b>131</b>      | <b>106</b>    | <b>18467</b>    | <b>10810</b> | <b>8094</b>     | <b>7206</b>   | <b>23897</b>  | <b>22364</b> | <b>16888</b>    | <b>14890</b>  |
| 427.0                            | Paroxysmal supraventricular tachycardia (%)                          | 7.22          | 4.63          | 5.27            | 5.55          | 4.14          | 23.75        | 20.00           | 16.95         | 8.08           | 5.64         | 7.63            | 9.43          | 11.18           | 7.01         | 7.76            | 8.19          | 4.17          | 3.41         | 3.99            | 4.20          |
| 427.1                            | Paroxysmal ventricular tachycardia (%)                               | 3.98          | 8.14          | 6.54            | 6.43          | 0.00          | 0.00         | 0.00            | 0.00          | 1.14           | 5.13         | 5.34            | 3.77          | 4.04            | 10.16        | 8.08            | 8.03          | 4.08          | 7.22         | 5.84            | 5.70          |
| 427.31                           | Atrial fibrillation (%)                                              | 33.85         | 45.48         | 46.69           | 46.26         | 0.00          | 0.00         | 0.00            | 0.00          | 4.17           | 13.85        | 18.32           | 19.81         | 29.28           | 47.17        | 48.54           | 48.11         | 38.77         | 45.10        | 46.22           | 45.74         |
| 427.32                           | Atrial flutter (%)                                                   | 4.03          | 6.36          | 6.27            | 6.08          | 0.00          | 1.25         | 1.43            | 0.00          | 1.64           | 9.74         | 9.92            | 8.49          | 4.04            | 7.81         | 7.56            | 7.27          | 4.16          | 5.65         | 5.64            | 5.51          |
| 427.5                            | Cardiac arrest (%)                                                   | 17.74         | 1.17          | 1.47            | 1.56          | 60.69         | 17.50        | 18.57           | 22.03         | 19.07          | 5.13         | 6.11            | 7.55          | 18.18           | 1.34         | 1.64            | 1.76          | 16.82         | 1.00         | 1.27            | 1.34          |
| 427.81                           | Sinoatrial node dysfunction (%)                                      | 6.16          | 14.40         | 12.55           | 11.73         | 0.00          | 0.00         | 0.00            | 0.00          | 0.38           | 3.08         | 3.05            | 1             |                 |              |                 |               |               |              |                 |               |
