# Supplementary material for: Comparison of emergency department and hospital admissions data for air pollution time-series studies
Source: PubMed Central journal article supplement (PMC3511882; doi:10.1186/1476-069x-11-70), 2012-09-21
Supplement: 1476-069X-11-70-S3.pdf [file 1476-069X-11-70-S3.pdf]

**Table A.3- Summary (lags 0-4) distributed lag model risk ratios for each data set for Ozone, Tudor Street monitor, RR expressed per IQR (27.3 ppb) increment**

| Outcome       | Sub-Group                    | ED    |              |              |         | All HA |              |              |         | Non-Elective HA |              |              |         | HA through ED |              |              |         |
|---------------|------------------------------|-------|--------------|--------------|---------|--------|--------------|--------------|---------|-----------------|--------------|--------------|---------|---------------|--------------|--------------|---------|
|               |                              | RR    | Lower 95% CI | Upper 95% CI | p-value | RR     | Lower 95% CI | Upper 95% CI | p-value | RR              | Lower 95% CI | Upper 95% CI | p-value | RR            | Lower 95% CI | Upper 95% CI | p-value |
| RD            | All                          | 1.020 | 0.999        | 1.043        | 0.066   | 1.003  | 0.967        | 1.039        | 0.882   | 1.007           | 0.969        | 1.046        | 0.732   | 1.004         | 0.965        | 1.045        | 0.833   |
|               | Age 0-1 years                | 1.049 | 1.006        | 1.094        | 0.024   | 1.027  | 0.907        | 1.163        | 0.676   | 1.057           | 0.927        | 1.206        | 0.406   | 1.086         | 0.947        | 1.246        | 0.238   |
|               | Age 2-18 years               | 1.038 | 1.002        | 1.075        | 0.040   | 1.101  | 0.995        | 1.218        | 0.062   | 1.110           | 0.998        | 1.233        | 0.054   | 1.119         | 1.001        | 1.249        | 0.047   |
|               | Age 19-64 years              | 1.011 | 0.984        | 1.039        | 0.444   | 0.982  | 0.926        | 1.042        | 0.556   | 0.995           | 0.934        | 1.061        | 0.889   | 0.996         | 0.934        | 1.063        | 0.909   |
|               | Age 65+ years                | 0.977 | 0.933        | 1.023        | 0.315   | 0.993  | 0.944        | 1.044        | 0.775   | 0.984           | 0.933        | 1.038        | 0.556   | 0.973         | 0.921        | 1.028        | 0.330   |
|               | Zip code not in poverty area | 1.019 | 0.996        | 1.043        | 0.112   | 1.001  | 0.962        | 1.042        | 0.962   | 1.007           | 0.965        | 1.050        | 0.757   | 1.007         | 0.964        | 1.053        | 0.754   |
|               | Zip code in poverty area     | 1.026 | 0.991        | 1.062        | 0.141   | 1.012  | 0.940        | 1.088        | 0.758   | 1.011           | 0.935        | 1.093        | 0.785   | 1.000         | 0.924        | 1.081        | 0.995   |
| Asthma/Wheeze | All                          | 1.069 | 1.028        | 1.111        | 0.001   | 1.070  | 0.992        | 1.154        | 0.082   | 1.101           | 1.017        | 1.192        | 0.018   | 1.106         | 1.020        | 1.200        | 0.014   |
|               | Age 0-1 years                | 1.093 | 0.992        | 1.204        | 0.072   |        |              |              |         |                 |              |              |         |               |              |              |         |
|               | Age 2-18 years               | 1.116 | 1.053        | 1.182        | 0.000   | 1.175  | 1.028        | 1.344        | 0.018   | 1.175           | 1.025        | 1.347        | 0.021   | 1.180         | 1.026        | 1.357        | 0.020   |
|               | Age 19-64 years              | 1.012 | 0.960        | 1.068        | 0.650   | 0.993  | 0.886        | 1.113        | 0.900   | 1.026           | 0.908        | 1.159        | 0.680   | 1.010         | 0.891        | 1.145        | 0.876   |
|               | Age 65+ years                | 1.100 | 0.932        | 1.298        | 0.261   | 1.139  | 0.922        | 1.406        | 0.228   |                 |              |              |         | 1.244         | 0.985        | 1.572        | 0.067   |
|               | Zip code not in poverty area | 1.066 | 1.019        | 1.116        | 0.006   | 1.054  | 0.960        | 1.157        | 0.268   | 1.091           | 0.989        | 1.205        | 0.083   | 1.108         | 1.001        | 1.227        | 0.048   |
|               | Zip code in poverty area     | 1.076 | 1.015        | 1.141        | 0.014   | 1.108  | 0.974        | 1.260        | 0.119   | 1.124           | 0.983        | 1.285        | 0.087   | 1.108         | 0.969        | 1.267        | 0.135   |
| Pneumonia     | All                          | 1.009 | 0.971        | 1.049        | 0.652   | 1.008  | 0.962        | 1.056        | 0.746   | 0.998           | 0.949        | 1.050        | 0.951   | 0.997         | 0.947        | 1.050        | 0.916   |
|               | Age 0-1 years                | 1.076 | 0.960        | 1.207        | 0.208   | 1.309  | 1.048        | 1.636        | 0.018   | 1.341           | 1.056        | 1.703        | 0.016   | 1.374         | 1.071        | 1.763        | 0.012   |
|               | Age 2-18 years               | 0.989 | 0.905        | 1.080        | 0.804   | 0.943  | 0.797        | 1.117        | 0.497   | 0.928           | 0.774        | 1.112        | 0.417   | 0.948         | 0.780        | 1.153        | 0.596   |
|               | Age 19-64 years              | 1.035 | 0.972        | 1.102        | 0.280   | 0.972  | 0.895        | 1.056        | 0.506   | 0.989           | 0.904        | 1.082        | 0.813   | 0.985         | 0.899        | 1.079        | 0.739   |
|               | Age 65+ years                | 0.978 | 0.920        | 1.041        | 0.487   | 1.017  | 0.957        | 1.080        | 0.588   | 0.990           | 0.928        | 1.056        | 0.763   | 0.987         | 0.924        | 1.055        | 0.703   |
|               | Zip code not in poverty area | 1.004 | 0.963        | 1.047        | 0.850   | 1.005  | 0.956        | 1.058        | 0.835   | 0.998           | 0.945        | 1.054        | 0.930   | 0.997         | 0.943        | 1.055        | 0.924   |
|               | Zip code in poverty area     | 1.035 | 0.947        | 1.131        | 0.447   | 1.018  | 0.910        | 1.139        | 0.755   | 1.003           | 0.888        | 1.134        | 0.960   | 1.002         | 0.886        | 1.132        | 0.980   |
| CVD           | All                          | 1.002 | 0.979        | 1.026        | 0.847   | 0.990  | 0.966        | 1.015        | 0.444   | 1.004           | 0.978        | 1.031        | 0.744   | 1.002         | 0.975        | 1.030        | 0.896   |
|               | Age 0-1 years                |       |              |              |         |        |              |              |         |                 |              |              |         |               |              |              |         |
|               | Age 2-18 years               |       |              |              |         |        |              |              |         |                 |              |              |         |               |              |              |         |
|               | Age 19-64 years              | 0.980 | 0.945        | 1.017        | 0.287   | 0.968  | 0.932        | 1.005        | 0.086   | 0.980           | 0.939        | 1.023        | 0.360   | 0.965         | 0.922        | 1.010        | 0.122   |
|               | Age 65+ Years                | 1.016 | 0.987        | 1.047        | 0.286   | 1.004  | 0.975        | 1.033        | 0.808   | 1.018           | 0.986        | 1.051        | 0.268   | 1.023         | 0.990        | 1.057        | 0.180   |
|               | Zip code not in poverty area | 0.991 | 0.966        | 1.016        | 0.470   | 0.983  | 0.957        | 1.009        | 0.198   | 0.995           | 0.967        | 1.024        | 0.747   | 0.991         | 0.962        | 1.020        | 0.533   |
|               | Zip code in poverty area     | 1.065 | 1.007        | 1.126        | 0.027   | 1.036  | 0.979        | 1.096        | 0.222   | 1.057           | 0.991        | 1.128        | 0.092   | 1.061         | 0.994        | 1.132        | 0.073   |
| Dysrhythmia   | All                          | 1.003 | 0.953        | 1.055        | 0.918   | 0.995  | 0.939        | 1.055        | 0.871   | 1.008           | 0.945        | 1.076        | 0.799   | 1.004         | 0.936        | 1.077        | 0.913   |
|               | Age 0-1 years                |       |              |              |         |        |              |              |         |                 |              |              |         |               |              |              |         |
|               | Age 2-18 years               |       |              |              |         |        |              |              |         |                 |              |              |         |               |              |              |         |
|               | Age 19-64 years              | 1.006 | 0.932        | 1.085        | 0.886   | 0.936  | 0.847        | 1.035        | 0.200   | 0.993           | 0.886        | 1.113        | 0.903   | 0.992         | 0.880        | 1.119        | 0.898   |
|               | Age 65+ years                | 0.999 | 0.933        | 1.070        | 0.978   | 1.026  | 0.957        | 1.100        | 0.473   | 1.016           | 0.939        | 1.100        | 0.687   | 1.011         | 0.928        | 1.100        | 0.805   |
|               | Zip code not in poverty area | 0.981 | 0.929        | 1.036        | 0.494   | 0.995  | 0.936        | 1.058        | 0.876   | 1.004           | 0.938        | 1.076        | 0.902   | 0.993         | 0.922        | 1.070        | 0.854   |
|               | Zip code in poverty area     | 1.145 | 1.008        | 1.299        | 0.037   | 1.000  | 0.850        | 1.177        | 0.999   | 1.048           | 0.874        | 1.257        | 0.615   | 1.083         | 0.898        | 1.306        | 0.405   |
| CHF           | All                          | 1.068 | 1.019        | 1.120        | 0.006   | 1.069  | 1.022        | 1.118        | 0.004   | 1.076           | 1.025        | 1.130        | 0.003   | 1.076         | 1.023        | 1.133        | 0.005   |
|               | Age 0-1 years                |       |              |              |         |        |              |              |         |                 |              |              |         |               |              |              |         |
|               | Age 2-18 years               |       |              |              |         |        |              |              |         |                 |              |              |         |               |              |              |         |
|               | Age 19-64 years              | 1.046 | 0.961        | 1.139        | 0.299   | 1.074  | 0.988        | 1.166        | 0.093   | 1.072           | 0.978        | 1.176        | 0.137   | 1.058         | 0.961        | 1.165        | 0.254   |
|               | Age 65+ years                | 1.079 | 1.021        | 1.140        | 0.007   | 1.068  | 1.013        | 1.126        | 0.014   | 1.078           | 1.019        | 1.141        | 0.009   | 1.084         | 1.022        | 1.150        | 0.008   |
|               | Zip code not in poverty area | 1.058 | 1.004        | 1.114        | 0.035   | 1.059  | 1.006        | 1.114        | 0.028   | 1.054           | 0.998        | 1.114        | 0.058   | 1.056         | 0.997        | 1.118        | 0.062   |
|               | Zip code in poverty area     | 1.105 | 1.004        | 1.217        | 0.040   | 1.107  | 1.006        | 1.218        | 0.037   | 1.163           | 1.047        | 1.291        | 0.005   | 1.152         | 1.037        | 1.280        | 0.009   |

RD: respiratory disease group, CVD: cardiovascular disease group, CHF: congestive heart failure, RR: risk ratio, 95% CI: 95% confidence interval, IQR: interquartile range, ED: emergency department, HA: hospital admission
