# Supplementary material for: Comparison of emergency department and hospital admissions data for air pollution time-series studies
Source: PubMed Central journal article supplement (PMC3511882; doi:10.1186/1476-069x-11-70), 2012-09-21
Supplement: 1476-069X-11-70-S4.pdf [file 1476-069X-11-70-S4.pdf]

**Table A.4-Summary (lags 0-4) distributed lag model risk ratios for each data set for PM<sub>2.5</sub>, Blair Street Monitor, RR expressed per IQR (9.3 µg/m<sup>3</sup>) increment**

| Outcome                  | Sub-Group                    | ED    |              |              |         | All HA |              |              |         | Non-Elective HA |              |              |         | HA through ED |              |              |         |
|--------------------------|------------------------------|-------|--------------|--------------|---------|--------|--------------|--------------|---------|-----------------|--------------|--------------|---------|---------------|--------------|--------------|---------|
|                          |                              | RR    | Lower 95% CI | Upper 95% CI | p-value | RR     | Lower 95% CI | Upper 95% CI | p-value | RR              | Lower 95% CI | Upper 95% CI | p-value | RR            | Lower 95% CI | Upper 95% CI | p-value |
| RD                       | All                          | 1.012 | 1.002        | 1.022        | 0.024   | 1.001  | 0.984        | 1.018        | 0.922   | 0.998           | 0.980        | 1.017        | 0.855   | 1.004         | 0.986        | 1.023        | 0.659   |
|                          | Age 0-1 years                | 1.018 | 0.999        | 1.037        | 0.061   | 1.027  | 0.973        | 1.084        | 0.340   | 1.018           | 0.961        | 1.079        | 0.538   | 1.033         | 0.973        | 1.097        | 0.286   |
|                          | Age 2-18 years               | 1.032 | 1.015        | 1.049        | 0.000   | 1.014  | 0.966        | 1.064        | 0.566   | 1.014           | 0.963        | 1.066        | 0.603   | 1.029         | 0.976        | 1.086        | 0.289   |
|                          | Age 19-64 years              | 1.000 | 0.987        | 1.013        | 0.997   | 0.996  | 0.969        | 1.025        | 0.801   | 0.994           | 0.964        | 1.024        | 0.685   | 1.004         | 0.974        | 1.035        | 0.789   |
|                          | Age 65+ years                | 0.999 | 0.978        | 1.021        | 0.933   | 0.997  | 0.974        | 1.021        | 0.805   | 0.995           | 0.970        | 1.021        | 0.717   | 0.995         | 0.969        | 1.021        | 0.692   |
|                          | Zip code not in poverty area | 1.013 | 1.002        | 1.025        | 0.016   | 1.000  | 0.982        | 1.019        | 0.974   | 1.000           | 0.980        | 1.020        | 0.974   | 1.003         | 0.982        | 1.024        | 0.791   |
| Zip code in poverty area | 1.006                        | 0.990 | 1.022        | 0.487        | 1.006   | 0.971  | 1.041        | 0.757        | 0.995   | 0.958           | 1.033        | 0.801        | 1.012   | 0.974         | 1.050        | 0.544        |         |
| Asthma/Wheeze            | All                          | 1.027 | 1.007        | 1.046        | 0.007   | 1.032  | 0.995        | 1.072        | 0.093   | 1.029           | 0.990        | 1.070        | 0.151   | 1.029         | 0.989        | 1.071        | 0.155   |
|                          | Age 0-1 years                | 1.047 | 0.999        | 1.097        | 0.057   |        |              |              |         |                 |              |              |         |               |              |              |         |
|                          | Age 2-18 years               | 1.050 | 1.021        | 1.080        | 0.001   | 1.052  | 0.985        | 1.123        | 0.132   | 1.039           | 0.972        | 1.112        | 0.262   | 1.042         | 0.973        | 1.117        | 0.241   |
|                          | Age 19-64 years              | 1.002 | 0.976        | 1.029        | 0.871   | 1.029  | 0.974        | 1.087        | 0.307   | 1.019           | 0.961        | 1.081        | 0.525   | 1.033         | 0.972        | 1.097        | 0.294   |
|                          | Age 65+ years                | 0.998 | 0.922        | 1.079        | 0.951   | 0.960  | 0.869        | 1.061        | 0.425   |                 |              |              |         | 0.981         | 0.879        | 1.094        | 0.731   |
|                          | Zip code not in poverty area | 1.022 | 0.999        | 1.045        | 0.056   | 1.039  | 0.993        | 1.087        | 0.101   | 1.041           | 0.992        | 1.092        | 0.100   | 1.038         | 0.988        | 1.091        | 0.135   |
| Zip code in poverty area | 1.036                        | 1.006 | 1.066        | 0.017        | 1.020   | 0.957  | 1.086        | 0.550        | 1.006   | 0.941           | 1.075        | 0.861        | 1.013   | 0.948         | 1.082        | 0.702        |         |
| Pneumonia                | All                          | 0.990 | 0.973        | 1.008        | 0.284   | 0.972  | 0.951        | 0.994        | 0.011   | 0.966           | 0.943        | 0.989        | 0.005   | 0.975         | 0.951        | 0.999        | 0.041   |
|                          | Age 0-1 years                | 0.964 | 0.916        | 1.014        | 0.158   | 0.936  | 0.846        | 1.034        | 0.193   | 0.927           | 0.832        | 1.033        | 0.170   | 0.979         | 0.875        | 1.095        | 0.712   |
|                          | Age 2-18 years               | 1.035 | 0.995        | 1.077        | 0.086   | 0.991  | 0.918        | 1.069        | 0.809   | 1.001           | 0.921        | 1.088        | 0.982   | 1.025         | 0.938        | 1.120        | 0.585   |
|                          | Age 19-64 years              | 0.989 | 0.960        | 1.018        | 0.439   | 0.963  | 0.926        | 1.002        | 0.060   | 0.962           | 0.922        | 1.004        | 0.078   | 0.976         | 0.935        | 1.019        | 0.265   |
|                          | Age 65+ years                | 0.975 | 0.947        | 1.004        | 0.095   | 0.978  | 0.950        | 1.006        | 0.128   | 0.967           | 0.938        | 0.997        | 0.034   | 0.969         | 0.939        | 1.000        | 0.050   |
|                          | Zip code not in poverty area | 0.990 | 0.970        | 1.009        | 0.296   | 0.970  | 0.947        | 0.993        | 0.012   | 0.965           | 0.941        | 0.991        | 0.007   | 0.970         | 0.944        | 0.996        | 0.023   |
| Zip code in poverty area | 0.993                        | 0.953 | 1.034        | 0.727        | 0.987   | 0.937  | 1.040        | 0.620        | 0.972   | 0.918           | 1.029        | 0.331        | 1.004   | 0.948         | 1.063        | 0.896        |         |
| CVD                      | All                          | 1.010 | 0.998        | 1.022        | 0.103   | 1.000  | 0.988        | 1.013        | 0.951   | 1.002           | 0.989        | 1.015        | 0.813   | 1.004         | 0.991        | 1.018        | 0.542   |
|                          | Age 0-1 years                |       |              |              |         |        |              |              |         |                 |              |              |         |               |              |              |         |
|                          | Age 2-18 years               |       |              |              |         |        |              |              |         |                 |              |              |         |               |              |              |         |
|                          | Age 19-64 years              | 1.010 | 0.992        | 1.028        | 0.295   | 1.003  | 0.985        | 1.022        | 0.736   | 1.001           | 0.980        | 1.023        | 0.903   | 1.005         | 0.983        | 1.028        | 0.660   |
|                          | Age 65+ Years                | 1.011 | 0.996        | 1.025        | 0.157   | 0.999  | 0.985        | 1.014        | 0.939   | 1.002           | 0.987        | 1.018        | 0.760   | 1.004         | 0.988        | 1.021        | 0.592   |
|                          | Zip code not in poverty area | 1.011 | 0.999        | 1.024        | 0.084   | 1.002  | 0.989        | 1.015        | 0.763   | 1.004           | 0.990        | 1.018        | 0.620   | 1.006         | 0.991        | 1.020        | 0.430   |
| Zip code in poverty area | 1.002                        | 0.975 | 1.031        | 0.861        | 0.990   | 0.962  | 1.018        | 0.468        | 0.990   | 0.958           | 1.022        | 0.525        | 0.995   | 0.964         | 1.027        | 0.759        |         |
| Dysrhythmia              | All                          | 1.020 | 0.995        | 1.046        | 0.123   | 1.006  | 0.978        | 1.036        | 0.672   | 1.013           | 0.981        | 1.046        | 0.435   | 1.027         | 0.992        | 1.063        | 0.134   |
|                          | Age 0-1 years                |       |              |              |         |        |              |              |         |                 |              |              |         |               |              |              |         |
|                          | Age 2-18 years               |       |              |              |         |        |              |              |         |                 |              |              |         |               |              |              |         |
|                          | Age 19-64 years              | 1.023 | 0.986        | 1.062        | 0.231   | 0.995  | 0.946        | 1.046        | 0.843   | 1.007           | 0.952        | 1.066        | 0.807   | 1.018         | 0.959        | 1.080        | 0.561   |
|                          | Age 65+ years                | 1.020 | 0.986        | 1.055        | 0.249   | 1.015  | 0.980        | 1.050        | 0.405   | 1.017           | 0.979        | 1.057        | 0.384   | 1.030         | 0.989        | 1.074        | 0.155   |
|                          | Zip code not in poverty area | 1.018 | 0.991        | 1.046        | 0.190   | 1.011  | 0.981        | 1.043        | 0.466   | 1.018           | 0.985        | 1.053        | 0.289   | 1.027         | 0.991        | 1.065        | 0.148   |
| Zip code in poverty area | 1.029                        | 0.966 | 1.095        | 0.378        | 0.968   | 0.893  | 1.050        | 0.435        | 0.970   | 0.887           | 1.062        | 0.515        | 1.020   | 0.930         | 1.119        | 0.668        |         |
| CHF                      | All                          | 1.009 | 0.987        | 1.033        | 0.419   | 1.008  | 0.986        | 1.031        | 0.483   | 1.008           | 0.984        | 1.032        | 0.538   | 1.010         | 0.986        | 1.036        | 0.414   |
|                          | Age 0-1 years                |       |              |              |         |        |              |              |         |                 |              |              |         |               |              |              |         |
|                          | Age 2-18 years               |       |              |              |         |        |              |              |         |                 |              |              |         |               |              |              |         |
|                          | Age 19-64 years              | 0.980 | 0.940        | 1.021        | 0.333   | 1.006  | 0.966        | 1.048        | 0.759   | 0.992           | 0.948        | 1.038        | 0.735   | 0.998         | 0.952        | 1.047        | 0.949   |
|                          | Age 65+ years                | 1.023 | 0.997        | 1.051        | 0.088   | 1.010  | 0.984        | 1.036        | 0.462   | 1.015           | 0.987        | 1.043        | 0.306   | 1.016         | 0.987        | 1.046        | 0.270   |
|                          | Zip code not in poverty area | 1.003 | 0.978        | 1.029        | 0.812   | 1.001  | 0.976        | 1.026        | 0.960   | 1.002           | 0.976        | 1.030        | 0.861   | 1.005         | 0.977        | 1.033        | 0.737   |
| Zip code in poverty area | 1.030                        | 0.983 | 1.080        | 0.208        | 1.035   | 0.988  | 1.085        | 0.146        | 1.026   | 0.975           | 1.080        | 0.325        | 1.029   | 0.977         | 1.083        | 0.283        |         |

RD: respiratory disease group, CVD: cardiovascular disease group, CHF: congestive heart failure, RR: risk ratio, 95% CI: 95% confidence interval, IQR: interquartile range, PM<sub>2.5</sub>: particulate matter ≤2.5 micrometers in diameter, ED: emergency department, HA: hospital admission
